# Supplementary material for: Accelerating Medicines Partnership: Parkinson's Disease. Genetic Resource
Source: PubMed Central journal article supplement (PMC8453903; doi:10.1002/mds.28549), 2021-05-07
Supplement: MDS-36-1795-s001.pdf [file MDS-36-1795-s001.pdf]

Supplemental Figure 1. Population plots with references populations

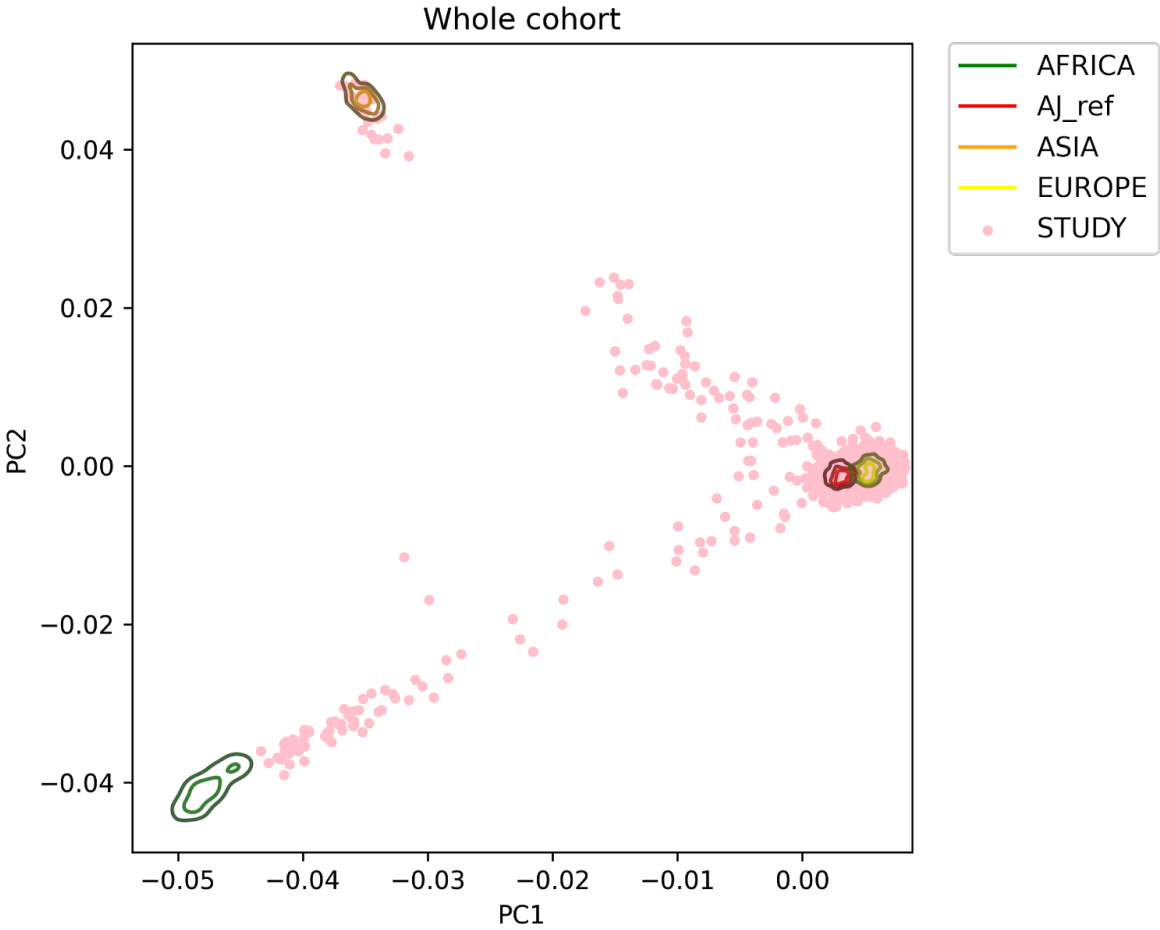

## Supplemental Figure 2. Genetic PC plots of European ancestry individuals

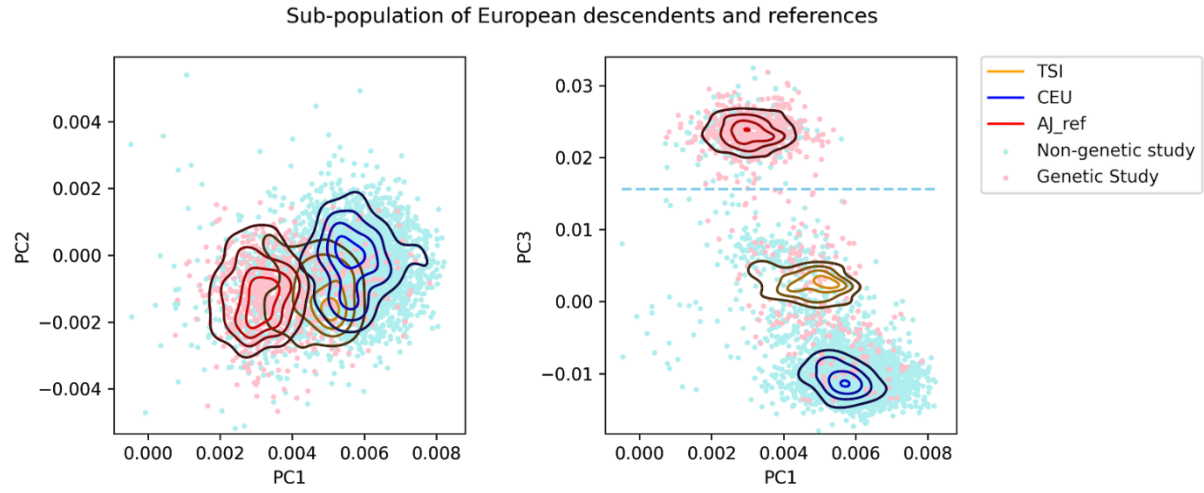

Blue dashed line represents the cut-off value to infer AJ population

AJ\_ref, Ashkenazi Jewish reference panel; CEU Northern Europeans from Utah; TSI, Toscani from Italy.  
Genetic study, genetically enriched cohorts; Non-genetic study, not genetically enriched cohorts.

---

Supplemental Table. AJ percentage among Europeans

| Cohort                | Category   | N of Europeans | AJ % |
|-----------------------|------------|----------------|------|
| BioFIND               |            |                |      |
|                       | HC         | 70             | 14.3 |
|                       | PD         | 99             | 16.2 |
| HBS                   |            |                |      |
|                       | HC         | 227            | 11.9 |
|                       | PD         | 640            | 12.3 |
| PDBP                  |            |                |      |
|                       | HC         | 470            | 3.2  |
|                       | PD         | 856            | 3.2  |
| PPMI Original Cohort  |            |                |      |
|                       | HC         | 190            | 11.1 |
|                       | PD         | 408            | 5.4  |
|                       | SWEDD      | 61             | 6.6  |
| PPMI Prodromal Cohort |            |                |      |
|                       | Prodromals | 61             | 3.3  |
| PPMI Genetic Cohort   |            |                |      |
|                       | HC_GC      | 210            | 72.4 |
|                       | PD_GC      | 178            | 53.9 |
| PPMI Genetic Registry |            |                |      |
|                       | HC_GR      | 164            | 67.7 |
|                       | PD_GR      | 125            | 85.6 |
| All                   |            | 3759           | 18.3 |

AJ, Ashkenazi Jewish; BF, BioFIND; PD, PDBP; PP, PPMI; HC, Healthy controls; PD, Parkinson's disease; GC, Genetic Cohort; GR, Genetic Registry.

## Group Authorships

| <b>Name</b>               | <b>Affiliation</b>                                                                                                                                                                                                                    | <b>AMP PD WGS Role</b> |
|---------------------------|---------------------------------------------------------------------------------------------------------------------------------------------------------------------------------------------------------------------------------------|------------------------|
| Andrew B Singleton        | Center for Alzheimer's and Related Dementias, National Institute on Aging, Bethesda, MD, USA<br><br>Laboratory of Neurogenetics, National Institute on Aging, Bethesda, MD, USA                                                       | Co-chair               |
| Ashutosh Pandey           | GlaxoSmithKline, 9911 Belward Campus Dr, Rockville, MD 20850, USA                                                                                                                                                                     | Member                 |
| Barry Landin              | Technome, Herndon, VA, USA                                                                                                                                                                                                            | Member                 |
| Bradford Casey            | The Michael J. Fox Foundation for Parkinson's Research, New York, NY, USA                                                                                                                                                             | Member                 |
| Christine Swanson-Fischer | National Institute of Neurological Disorders and Stroke, National Institutes of Health, Bethesda, MD 20824, USA                                                                                                                       | Member                 |
| Clemens R. Scherzer       | Harvard Medical School, Brigham and Women's Hospital, Boston, MA, USA                                                                                                                                                                 | Member                 |
| David Pulford             | GlaxoSmithKline, 9911 Belward Campus Dr, Rockville, MD 20850                                                                                                                                                                          | Member                 |
| David Vismer              | Technome, Herndon, VA, USA                                                                                                                                                                                                            | Member                 |
| Debra Babcock             | National Institute of Neurological Disorders and Stroke, National Institutes of Health, Bethesda, MD 20824, USA                                                                                                                       | Member                 |
| Dena G Hernandez          | Laboratory of Neurogenetics, National Institute on Aging, Bethesda, MD, USA                                                                                                                                                           | Member                 |
| Dinesh Kumar              | Sanofi, Seattle, WA, USA                                                                                                                                                                                                              | Member                 |
| Dongyu Liu                | Sanofi, Seattle, WA, USA                                                                                                                                                                                                              | Member                 |
| Eline Appelmans           | 11400 Rockville Pike #600, North Bethesda, MD 20852, USA                                                                                                                                                                              | Facilitator            |
| Hampton L. Leonard        | Data Tecnica International, Glen Echo, MD, USA<br><br>Center for Alzheimer's and Related Dementias, National Institute on Aging, Bethesda, MD, USA<br><br>Laboratory of Neurogenetics, National Institute on Aging, Bethesda, MD, USA | Member                 |
| Hiroataka Iwaki MD        | Data Tecnica International, Glen Echo, MD, USA                                                                                                                                                                                        | Member                 |

|                     |                                                                                                                                                                                                                                       |        |
|---------------------|---------------------------------------------------------------------------------------------------------------------------------------------------------------------------------------------------------------------------------------|--------|
|                     | Center for Alzheimer's and Related Dementias, National Institute on Aging, Bethesda, MD, USA<br><br>Laboratory of Neurogenetics, National Institute on Aging, Bethesda, MD, USA                                                       |        |
| J. Raphael Gibbs    | Laboratory of Neurogenetics, National Institute on Aging, Bethesda, MD, USA                                                                                                                                                           | Member |
| Lynn Jakeman        | National Institute of Neurological Disorders and Stroke, National Institutes of Health, Bethesda, MD 20824, USA                                                                                                                       | Member |
| Mahdiar Sadeghi     | The American Genome Center, Uniformed Services University of the Health Sciences, Bethesda, MD, USA<br><br>Previously Sanofi, Seattle, WA, USA                                                                                        | Alumni |
| Mary B. Makarious   | Laboratory of Neurogenetics, National Institute on Aging, Bethesda, MD, USA                                                                                                                                                           | Member |
| Margaret Sutherland | 801 Jefferson Avenue, Redwood, CA, USA<br><br>Previously National Institute of Neurological Disorders and Stroke, National Institutes of Health, Bethesda, MD 20824, USA                                                              | Alumni |
| Mark Frasier        | The Michael J. Fox Foundation for Parkinson's Research, New York, NY, USA                                                                                                                                                             | Member |
| Matt Edwards        | Verily Life Sciences, San Jose, CA, USA                                                                                                                                                                                               | Member |
| Matt Bookman        | Verily Life Sciences, San Jose, CA, USA                                                                                                                                                                                               | Member |
| Meaghan Cogswell    | Sanofi, Seattle, WA, USA                                                                                                                                                                                                              | Member |
| Mike A. Nalls       | Data Tecnica International, Glen Echo, MD, USA<br><br>Center for Alzheimer's and Related Dementias, National Institute on Aging, Bethesda, MD, USA<br><br>Laboratory of Neurogenetics, National Institute on Aging, Bethesda, MD, USA | Member |
| Robert Moccia       | 1275 Pennsylvania Avenue NW STE 600, Washington, DC 20004, USA                                                                                                                                                                        | Member |

|                   |                                                                                                                                                                     |          |
|-------------------|---------------------------------------------------------------------------------------------------------------------------------------------------------------------|----------|
| Rosa Canet-Aviles | 35 Cambridge Park Dr Suite 200,<br>Cambridge, MA 02140<br><br>Previously 11400 Rockville Pike<br>#600, North Bethesda, MD 20852,<br>USA                             | Alumni   |
| Shameek Biswas    | Bristol Myers Squibb, Seattle, WA,<br>USA                                                                                                                           | Co-chair |
| Sonja W. Scholz   | National Institute of Neurological<br>Disorders and Stroke, Bethesda,<br>MD, USA<br><br>Department of Neurology, Johns<br>Hopkins University, Baltimore,<br>MD, USA | Member   |
| Srini Shankara    | Sanofi, Seattle, WA, USA                                                                                                                                            | Member   |
| Xianjun Dong      | Harvard Medical School, Brigham<br>and Women's Hospital, Boston,<br>MA, USA                                                                                         | Member   |

AMP PD consortium ([admin@amp-pd.org](mailto:admin@amp-pd.org)) members

#### Uniformed Services University of the Health Sciences Associates

| <b>Name</b>            | <b>Affiliation</b>                                                                                                              | <b>Title and Role</b>                                                                                                                                                            |
|------------------------|---------------------------------------------------------------------------------------------------------------------------------|----------------------------------------------------------------------------------------------------------------------------------------------------------------------------------|
| Adelani Adeleye        | Henry M. Jackson Foundation for the<br>Advancement of Military Medicine,<br>Inc., Bethesda, MD 20817                            | System Administrator, implemented and<br>conducted data transfer to NIH                                                                                                          |
| Camille Alba           | Henry M. Jackson Foundation for the<br>Advancement of Military Medicine,<br>Inc., Bethesda, MD 20817                            | Research Assistant, managed project and sample<br>tracking, supervised and conducted DNA quality<br>control, library preparation, library quality<br>control, sequencing for WGS |
| Dagmar Bacikova        | Henry M. Jackson Foundation for the<br>Advancement of Military Medicine,<br>Inc., Bethesda, MD 20817                            | Lab Manager, manages laboratory logistics and<br>supplies for team personnel                                                                                                     |
| Clifton L. Dalgard     | Department of Anatomy, Physiology<br>& Genetics, Uniformed Services<br>University of the Health Sciences,<br>Bethesda, MD 20814 | Director, designed and directs all programmatic,<br>laboratory and financial components for center<br>activities                                                                 |
| Daniel N. Hupalo       | Henry M. Jackson Foundation for the<br>Advancement of Military Medicine,<br>Inc., Bethesda, MD 20817                            | Computational Biologist, oversaw WGS data<br>quality control and assembled data transfer<br>selection and tracking                                                               |
| Elisa McGrath Martinez | Henry M. Jackson Foundation for the<br>Advancement of Military Medicine,<br>Inc., Bethesda, MD 20817                            | Research Assistant, conducted library<br>preparation, quality control, pooling and<br>sequencing for WGS                                                                         |
| Sraavya Poliseti       | Henry M. Jackson Foundation for the<br>Advancement of Military Medicine,<br>Inc., Bethesda, MD 20817                            | Research Technician, performed DNA quality<br>assessment, quality control and sequencing for<br>WGS                                                                              |

|                      |                                                                                                |                                                                                                                                                                 |
|----------------------|------------------------------------------------------------------------------------------------|-----------------------------------------------------------------------------------------------------------------------------------------------------------------|
| John Rosenberger     | Henry M. Jackson Foundation for the Advancement of Military Medicine, Inc., Bethesda, MD 20817 | Senior Research Assistant, oversaw sequencing platform performance for WGS                                                                                      |
| Anthony R. Soltis    | Henry M. Jackson Foundation for the Advancement of Military Medicine, Inc., Bethesda, MD 20817 | Senior Computational Biologist, reviewed and evaluated WGS analysis pipeline and performance                                                                    |
| Gauthaman Sukumar    | Henry M. Jackson Foundation for the Advancement of Military Medicine, Inc., Bethesda, MD 20817 | Research Associate, conducted library preparation, quality control, pooling and sequencing for WGS                                                              |
| Miranda F. Tompkins  | Henry M. Jackson Foundation for the Advancement of Military Medicine, Inc., Bethesda, MD 20817 | Research Technician, performed DNA quality assessment, quality control and sequencing for WGS                                                                   |
| Meila Tuck           | Henry M. Jackson Foundation for the Advancement of Military Medicine, Inc., Bethesda, MD 20817 | Research Technician, performed DNA quality assessment, quality control and sequencing for WGS                                                                   |
| Coralie Violet       | Henry M. Jackson Foundation for the Advancement of Military Medicine, Inc., Bethesda, MD 20817 | Scientist, conducted entry of subcohorts into project workload, initiated and tracked laboratory subprojects, reported subcohort quality control and completion |
| Matthew D. Wilkerson | Henry M. Jackson Foundation for the Advancement of Military Medicine, Inc., Bethesda, MD 20817 | Bioinformatics Director, designed and directs WGS analysis pipeline and performance                                                                             |
| Xijun Zhang          | Henry M. Jackson Foundation for the Advancement of Military Medicine, Inc., Bethesda, MD 20817 | Computational Biologist, designed and implements sequencing quality control dashboard and implemented panel-based cohort VCF generator                          |
